# Supplementary material for: Astaxanthin targets IL-6 and alleviates the LPS-induced adverse inflammatory response of macrophages
Source: Royal Society of Chemistry journal article supplement (doi:10.1039/d4fo00610k), 2024-01-01
Supplement: d4fo00610k1.pdf [file d4fo00610k1.pdf]

**Supplementary Information**

**Astaxanthin targets IL-6 and alleviates the LPS-induced adverse  
inflammatory response of macrophages**

**Yahui Wu <sup>a,b</sup>, Mona A. Bashir <sup>a,b</sup>, Changsheng Shao <sup>c</sup>, Han Wang <sup>a,b</sup>, Jianxia Zhu <sup>a,d</sup>,  
Qing Huang <sup>a,b,\*</sup>**

<sup>a</sup> *CAS Key Laboratory of High Magnetic Field and Ion Beam Physical Biology, Anhui Key  
Laboratory of Environmental Toxicology and Pollution Control Technology, Hefei Institute of  
Intelligent Agriculture, Institute of Intelligent Machines, Hefei Institutes of Physical Science,  
Chinese Academy of Sciences, Hefei 230031, China.*

<sup>b</sup> *Science Island Branch of Graduate School, University of Science & Technology of China,  
Hefei 230026, China.*

<sup>c</sup> *High Magnetic Field Laboratory, Hefei Institutes of Physical Science, Chinese Academy of  
Sciences, Hefei 230031, China.*

<sup>d</sup> *School of Nursing, Anhui Medical University, Hefei, Anhui 230032, China.*

\* Corresponding author: Professor Qing Huang

Tel: 86-551-65595261; Fax: 86-551-65595261

Email: huangq@ipp.ac.cn

ORCID: 0000-0002-8884-2064

24 **The supplementary information contains the following parts:**

25 Fig. S1 PMA induced THP-1 monocytes to differentiate into macrophages.

26 Fig. S2 Effect of different concentrations of LPS and AST on the viability of THP-1-derived  
27 macrophages.

28 Fig. S3 AST targets and inflammatory targets.

29 Fig. S4 Molecular docking analysis and molecular dynamics simulation of AST-TNF- $\alpha$ .

30 Fig. S5 The expression of TNF- $\alpha$ , STAT3 and NF- $\kappa$ B mRNA levels after the interference of TNF-  
31  $\alpha$  siRNA

32 Table S1 PCR primer sequences.

33 Table S2 Partial core target attributes.

34 Table S3 Binding energy of IL-6 and AST.

36 We initially induced THP-1 cells with 100 ng/mL PMA for 24 h to prompt  
37 differentiation into macrophages. Morphological observations were recorded,  
38 including images. Morphological observations revealed that untreated cells were  
39 transparent and spherical, remaining suspended after 24 h of culture. Following  
40 induction with 100 ng/mL PMA for 24 h, cells exhibited irregular shapes, a fusiform  
41 morphology, with protruding pseudopods and adherent growth. Flow cytometry was  
42 also employed to measure the expression level of the THP-1-derived macrophage-  
43 specific protein CD11b. Flow cytometry results indicated a significant increase in the  
44 expression of the cell surface-specific protein CD11b after induction with 100 ng/mL  
45 PMA, suggesting the successful differentiation of THP-1 monocytes into macrophages  
46 (Fig. S1A-B).

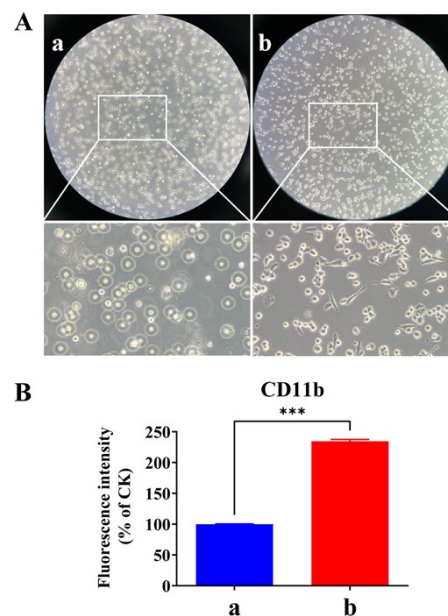

47 **Fig. S1 PMA induced THP-1 monocytes to differentiate into macrophages.** (A) Cell  
48 morphology observation (×40). (B) Expression of cell surface specific protein CD11b. a:  
49 uninduced group; b:100 ng/mL PMA induction group. (n = 3/group; mean ± SD; \*\*\*  
50 represent  $p < 0.001$ .)

We assessed the cytotoxic effect of LPS on THP-1 macrophages using a CCK-8 assay. Under our experimental conditions, no significant change in cell viability was observed at a mass concentration of 1.0  $\mu\text{g/mL}$  ( $p > 0.05$ ). However, other concentrations of LPS demonstrated varying degrees of inhibition on THP-1 cell viability. Therefore, we selected LPS with a concentration of 1.0  $\mu\text{g/mL}$  as the optimal treatment concentration for the experiment (Fig. S2A).

The optimal treatment concentration of AST was screened under the concentration of LPS. Different concentration gradients of AST (0, 25, 50, 100  $\mu\text{M}$ ) were used to treat the cells for 3 h, and then the screened LPS concentration (1.0  $\mu\text{g/mL}$ ) was used to stimulate THP-1-derived macrophages to produce inflammation, and THP-1-derived macrophage viability was determined by CCK-8 assay. The results are shown in the Fig. S2B. With the increase of the concentration, the cell viability showed a general trend of increasing and then decreasing; compared with the 0  $\mu\text{M}$  AST group, the cell viability could be significantly enhanced when the concentration was at 25  $\mu\text{M}$  and 50  $\mu\text{M}$ , and the cell viability was the strongest at the concentration of 50  $\mu\text{M}$ ; there was no significant change in cell viability at the concentration of 100  $\mu\text{M}$ . Therefore, AST at 50  $\mu\text{M}$  was selected as the optimal treatment concentration for the experiment.

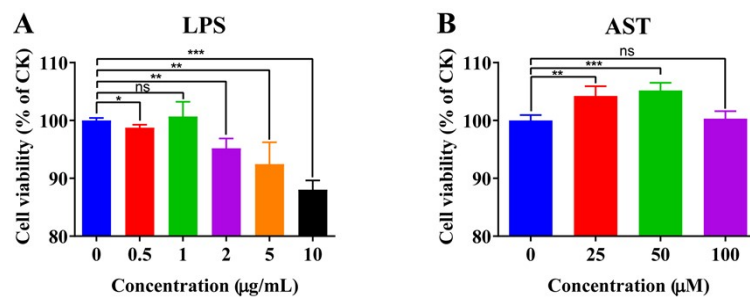

**Fig. S2 Effect of different concentrations of LPS and AST on the viability of THP-1-derived macrophages.** (A) The effects of different concentrations of LPS on the viability of THP-1-derived macrophages. (B) The effects of different concentrations of AST on the viability of THP-1-derived macrophages. ( $n = 3/\text{group}$ ; mean  $\pm$  SD; \* represent  $p < 0.05$ ; \*\*

75 represent  $p < 0.01$ ; \*\*\* represent  $p < 0.001$ ; ns represent no significant difference compared  
 76 with the control group.)

77 The 2D structure of AST was obtained from the Pubchem database, and the AST  
 78 SMILE name was entered into the SWISS Target Prediction database to obtain 100  
 79 potential targets of AST. Using "Inflammation" as the keyword, we searched for  
 80 targets in GeneCards and DisGeNET databases. 467 inflammation-associated genes  
 81 were retrieved from DisGeNET database, and 1500 inflammation-associated genes  
 82 were retrieved and screened from GeneCards database, which gave us a total of 1625  
 83 potential disease-activating targets by integrating all the targets and removing  
 84 duplicates.

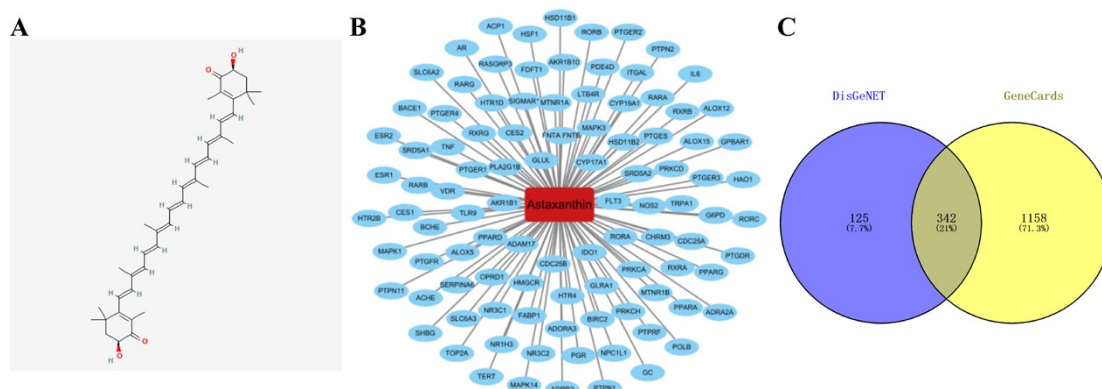

85  
 86 **Fig. S3 AST targets and inflammatory targets.** (A) Astaxanthin 2D structural diagram.  
 87 (B) AST-target network diagram. (C) The cross-Venn diagram of inflammatory targets was  
 88 searched in the database.

89 To verify whether TNF- $\alpha$  is the target of AST, we used *in silico* calculations  
 90 based on molecular docking, molecular dynamics simulation, and identified TNF- $\alpha$   
 91 also as a target of AST (Fig.S4).

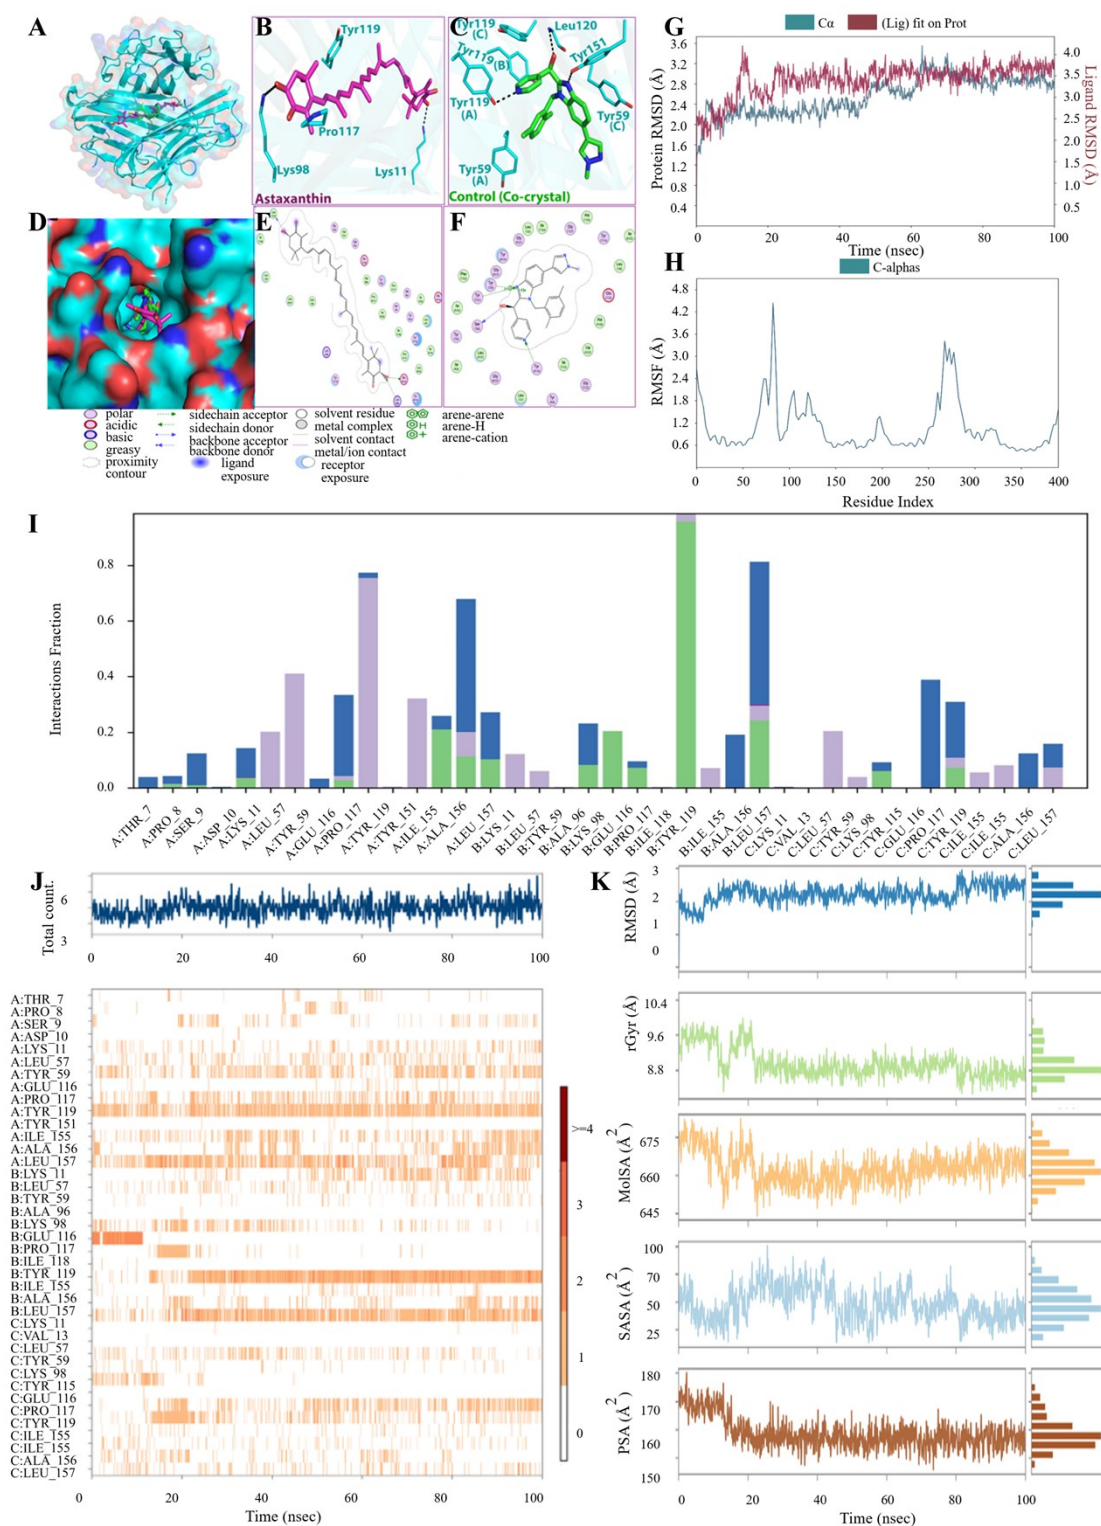

92

93 **Fig. S4 Molecular docking analysis and molecular dynamics simulation.** (A) - (F) 2D  
 94 and 3D visualization of AST-TNF- $\alpha$  complex. (G) - (H) RMSD (Left) and RMSF (Right) of  
 95 AST-TNF- $\alpha$  interaction. (I) AST-TNF- $\alpha$  contact mapping shows the hydrogen bonding  
 96 during 100 ns simulation time. (J) - (K) AST-TNF- $\alpha$  contact mapping shows many amino

97 acids participate in the interaction of AST with TNF- $\alpha$  (Left) and the behavior of AST  
 98 inside the TNF- $\alpha$  pocket during 100 ns simulation time (Right).

99 Furthermore, we conducted the TNF- $\alpha$  interference experiment for comparison. Fig. S5A  
 100 shows that compared to the LPS (NC) group, the expression of TNF- $\alpha$  in the AST + LPS (NC)  
 101 group significantly decreased, demonstrating that AST could inhibit the expression of TNF- $\alpha$ . The  
 102 TNF- $\alpha$  in the LPS (si-TNF- $\alpha$ ) group also significantly decreased, confirming the success of the  
 103 interference experiment. To check whether there is correlation between TNF- $\alpha$  and NF- $\kappa$ B and  
 104 STAT3, we also examined the expression levels of NF- $\kappa$ B and STAT3 in macrophages after TNF-  
 105  $\alpha$  interference. As presented in Fig. S5B-C. There was no significant difference in the expression  
 106 of NF- $\kappa$ B and STAT3 between LPS (si-TNF- $\alpha$ ) group and LPS (NC) group, indicating that TNF- $\alpha$   
 107 interference had no effect on the expression of NF- $\kappa$ B and STAT3 in LPS-treated macrophages,  
 108 and TNF- $\alpha$  could not regulate NF- $\kappa$ B and STAT3.

109

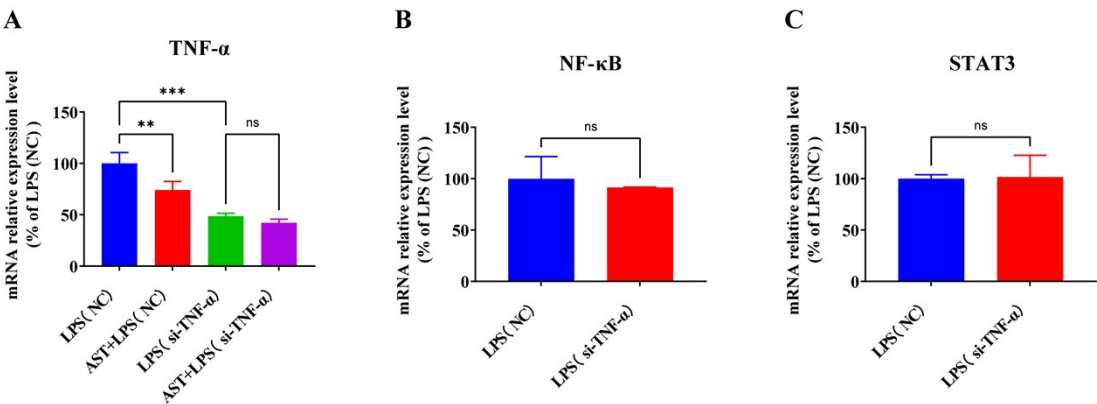

110

111 **Fig. S5 The expression of TNF- $\alpha$ , NF- $\kappa$ B and STAT3 mRNA levels after the**  
 112 **interference of TNF- $\alpha$  siRNA.** (n = 3/group; mean  $\pm$  SD; \*\* represent p < 0.01; \*\*\*  
 113 represent p < 0.001; ns represent no significant difference compared with the control  
 114 group.)

115

116 **Table S1**  
 117 **PCR primer sequences.**

| Name                   | Sequence (5'→3')        |
|------------------------|-------------------------|
| H-pro-IL-1 $\beta$ -QF | ATGGACAAGCTGAGGAAGATG   |
| H-pro-IL-1 $\beta$ -QR | CCCATGTGTCTGAAGAAGATAGG |

|                      |                          |
|----------------------|--------------------------|
| H-IL-1 $\beta$ -QF   | CCTATTACAGTGGCAATGAGGATG |
| H-IL-1 $\beta$ -QR   | AGTGGTGGTCGGAGATTTCG     |
| H-IL-6-QF            | GAAAGCAGCAAAGAGGCACT     |
| H-IL-6-QR            | AGCTCTGGCTTGTTCTCTCAC    |
| H-IL-8-QF            | CTGATTTCTGCAGCTCTGTG     |
| H-IL-8-QR            | GGGTGGAAAGGTTTGGAGTATG   |
| H-TNF- $\alpha$ -QF  | TGGGCAGGTCTACTTTGGGATCAT |
| H-TNF- $\alpha$ -QR  | TTTGAGCCAGAAGAGGTTGAGGGT |
| H-NLRP3-QF           | AACATGCCCAAGGAGGAAGA     |
| H-NLRP3-QR           | GGCTGTTCACCAATCCATGA     |
| H-Caspase1-QF        | GCACACGTCTTGCTCTCATT     |
| H-Caspase1-QR        | GCCTCCAGCTCTGTAGTCAT     |
| H-COX-2-QF           | CCAGCACTTCACGCATCAGT     |
| H-COX-2-QR           | ACGCTGTCTAGCCAGAGTTTCAC  |
| H-NF- $\kappa$ B-QF  | TGGGAATCCAGTGTGTGAAG     |
| H-NF- $\kappa$ B-QR  | CACAGCATTTCAGGTCGTAGT    |
| H-STAT3-QF           | TCCATCAGCTCTACAGTGACAGC  |
| H-STAT3-QR           | TCCCAGGAGATTATGAAACACC   |
| H-p53-QF             | GCGTGTGGAGTATTTGGATGAC   |
| H-p53-QR             | AGTGTGATGATGGTGAGGATGG   |
| H- $\beta$ -Actin-QF | ATTGCCGACAGGATGCAGAA     |
| H- $\beta$ -Actin-QR | GCTGATCCACATCTGCTGGAA    |

118

119 **Table S2**

120 Partial core target attributes.

121 (The Degree value is used to screen the core targets and the target that is greater than the average

122 Degree is considered as the core target)

| Target  | Betweenness Centrality | Closeness Centrality | Degree |
|---------|------------------------|----------------------|--------|
| IL6     | 0.303264191            | 0.85                 | 84     |
| TNF     | 0.272938466            | 0.836065574          | 82     |
| MAPK3   | 0.07063399             | 0.653846154          | 52     |
| PPARG   | 0.041104656            | 0.62195122           | 42     |
| ESR1    | 0.015159691            | 0.573033708          | 34     |
| MAPK1   | 0.009332702            | 0.566666667          | 34     |
| MAPK14  | 0.011614205            | 0.566666667          | 34     |
| PPARA   | 0.034632639            | 0.554347826          | 30     |
| NR3C1   | 0.014905363            | 0.542553191          | 28     |
| CYP19A1 | 0.006198011            | 0.542553191          | 26     |
| PGR     | 0.010395156            | 0.53125              | 24     |
| PTGES   | 0.063672786            | 0.536842105          | 24     |
| AR      | 0.002258278            | 0.525773196          | 22     |
| ALOX5   | 0.010923382            | 0.536842105          | 22     |
| PTPN1   | 0.001227881            | 0.515151515          | 20     |
| PTPN11  | 0.008488044            | 0.51                 | 20     |
| PTGER4  | 0.059099317            | 0.53125              | 20     |
| PLA2G1B | 0.012350352            | 0.525773196          | 20     |
| PRKCA   | 0.002137623            | 0.515151515          | 20     |

123

124 **Table S3**  
 125 Binding energy of IL-6 and AST.

| Ligand               | Binding Energy | MMGBSA dG Bind (NS) |
|----------------------|----------------|---------------------|
| Astaxanthin          | -11.1          | -96.39              |
| Control (Co-crystal) | -13.9          | -68.13              |

126
